# Supplementary material for: Direct electron transfer reaction of laccase on a glassy carbon electrode modified with 1-aminopyrene functionalized reduced graphene oxide
Source: Royal Society of Chemistry journal article supplement (doi:10.1039/c3ra42312c), 2013-01-01
Supplement: c3ra42312c.pdf [file c3ra42312c.pdf]

Supplemental information

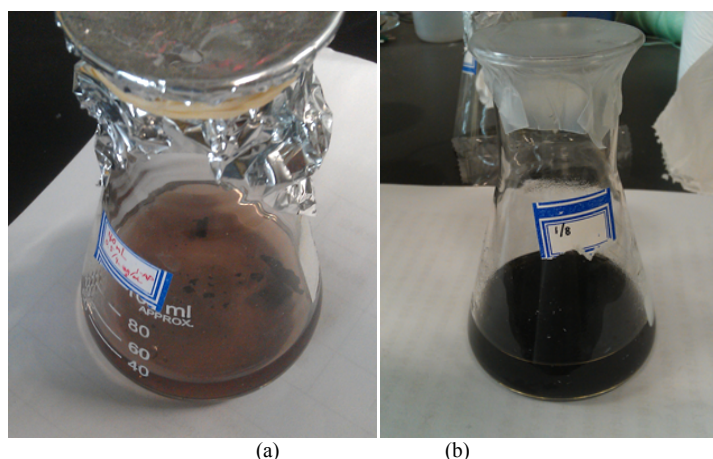

Fig. S1 Photographs of rGO immersed in ethanol, which was prepared through the hydrohalic acid method (a) without and (b) with ultrasonic pre-dispersion of GO

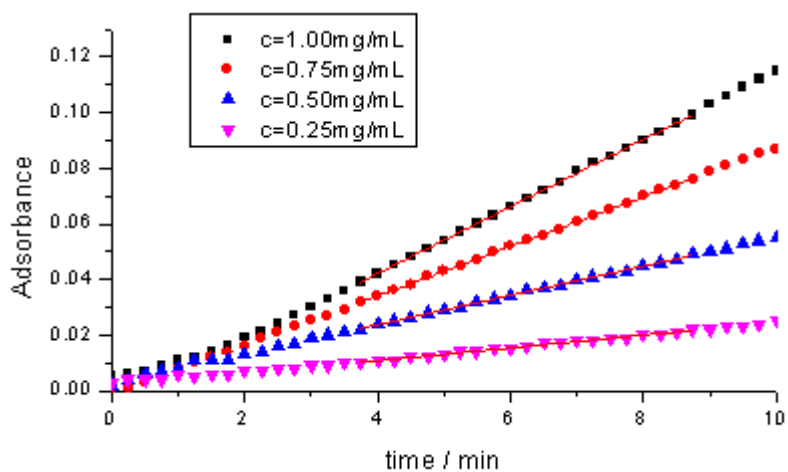

(a)

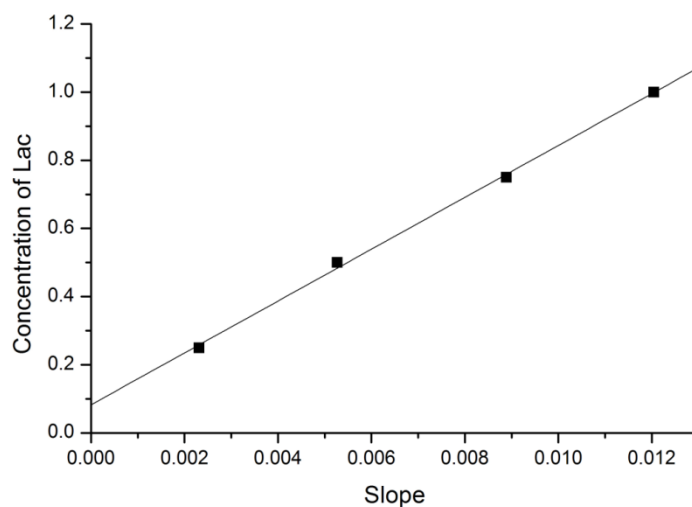

(b)

Fig. S2 (a) Absorbance at 420 nm with the reaction time at four concentrations of Lac; (b) calibration curve of Lac concentration and its corresponding enzyme activity represented by the slope.
